# 1 Knowledge and attitude regarding stem cell research and its 2 application among medical students in Pakistan

3 Authors: Mashal Daud<sup>1\*&</sup>, Zaina Sajid<sup>1&</sup>, Tooba Ali<sup>1&</sup>

4 <sup>1</sup>Rawalpindi Medical University, Rawalpindi, Pakistan

5 \*Corresponding author

6 E-mail: [mashal08@gmail.com](mailto:mashal08@gmail.com) (MD)

7 &These authors contributed equally to this work.

---

## 8 Abstract

9 **Background:** The utilization of stem cells (SCs) has led the way into a new era of  
10 therapeutics known as regenerative medicine. Their renewal property offers exciting  
11 possibilities in reversing tissue damage caused by metabolic and degenerative  
12 changes. Research should be conducted increasingly to explore the possibilities of SC  
13 utilization in Pakistan.

14 **Objectives:** To assess the level of knowledge, perception, and attitude of medical  
15 students regarding stem cell research (SCR) and its application, to obtain a better  
16 insight into the future of stem cell therapy in Pakistan as it is a rapidly emerging field in  
17 medicine.

18 **Materials and Methods:** This cross-sectional study was carried out using a self-  
19 administered questionnaire filled by 206 medical students from different medical  
20 colleges in Pakistan. A convenience sampling method was used. Knowledge and  
21 attitude scores were calculated based on answers to 28 well-structured questions. Data  
22 was analyzed using SPSS.

23 **Results:** The mean values of the answers showed that 60.2% (n=124) of the students  
24 had a good knowledge and 39.8% (n=82) had poor knowledge of stem cells. Whereas,  
25 56.8% (n=117) expressed a positive attitude and 43.2% (n=89) expressed a negative  
26 attitude towards SCR. Independent t-test applied on knowledge score and attitude  
27 showed that the mean knowledge score of people with a positive attitude is higher i.e.  
28 21.25 as compared to the mean knowledge score of people with negative attitude i.e.  
29 19.21. And the difference of the means is significant at p=0.007. Thus, the attitude of  
30 students was observed to be significantly dependent on their knowledge about SCR.  
31 **Conclusion:** The results show that medical students have baseline knowledge about  
32 SC therapy and a positive attitude towards it. Seminars, workshops should be  
33 conducted and this topic should be added to their syllabus so that they obtain proper  
34 information about SCR and encourage further research.

35 **Keywords:** Regenerative medicine, stem cell research, medical students

---

## 36 INTRODUCTION

37 Stem cells (SC) are clonal cells that can differentiate into other types of cells and  
38 possess the property of self-renewal through mitotic divisions [1]. They are  
39 uncommitted progenitor cells, present in all multi-cellular organisms, which give rise to  
40 characteristic cells of organs and tissues. These cells are unique in their ability to keep  
41 on dividing and regenerate their population, in contrast to the differentiated cells, which  
42 do not divide and deplete if they are damaged. On the basis of potency, they are  
43 classified as uni-potent cells; which can differentiate into single mature cell type,  
44 pluripotent cells; which can give rise to most types of cells necessary for fetal  
45 development and totipotent cells; which can give rise to all cells types found in the fetus

46 [2]. The sources to obtain these cells can be Placenta (Cord SCs), Fetal tissue or  
47 blastocyst (Embryonal SCs) and Blood, tissue or bone marrow (Adult SCs) [3].

48 Hematopoietic stem cell transplantation is an established treatment method for  
49 bone marrow failure diseases. The first allogeneic transplantation was performed by E.  
50 Donnal Thomas in 1957 and in Pakistan, the first transplant was done in 1995 at Dr.  
51 Ziauddin Hospital by Dr. Tahir Shamsi [4,5]. Recently, advances have been made  
52 towards the application of SC therapy for the treatment of diseases like Alzheimer's,  
53 diabetes, immune-genetic conditions, cancers, Parkinson's etc [6,7,8].

54 Research is being conducted increasingly in the field of cell biology worldwide in  
55 the light of its potential therapeutic benefit. It is becoming a popular option for treatment  
56 of those diseases that did not have adequate management available in the past. The  
57 use of stem cells has given birth to a new era of therapeutics which is known as  
58 regenerative medicine. Their renewal property offers exciting possibilities in reversing  
59 tissue damage caused by metabolic and degenerative changes. These scientific  
60 advancements require the healthcare workers to be equipped with knowledge regarding  
61 better innovative treatment options.

62 Guidelines for SC research in Pakistan have been developed by the National  
63 Bioethics Committee, Pakistan and adopted by the Human Organ Transplant Authority.  
64 However, it is still relatively new in Pakistan with less than twenty stem cell research  
65 institutes and limited awareness regarding the application of stem cell therapy among  
66 the healthcare workers, medical students as well as the general public. There is also a  
67 deficit in studies deducing the knowledge and attitude regarding stem cell research  
68 among the medical community in Pakistan. This demands avid exploration into the

69 domain of stem cell research where the medical students lack knowledge. It indicates  
70 the significance of studying the cultural and religious factors that govern the level of  
71 interest and attitude of medical students regarding the subject. It is therefore timely that  
72 research be conducted to assess the level of knowledge, perception and attitude of  
73 medical students regarding stem cell research and its application to obtain a better  
74 insight into the future of SC therapy in Pakistan. Identification of the indistinct areas can  
75 better enable the medical community to take concrete measures to positively impact the  
76 students' attitudes and supplement their knowledge about stem cells research. Better  
77 awareness can positively impact the progress in the field of regenerative medicine.

## 78 **Materials and Methods**

79 This cross-sectional study was conducted from May 2019 to June 2019 after  
80 procuring an Approval Letter from the Ethical Review Board of the authors' university. A  
81 convenience sampling method was used. A well-structured online questionnaire was  
82 made to be filled by 206 medical students from different medical colleges of Pakistan  
83 voluntarily. Full confidentiality was assured to the participants.

84 The questionnaire consisted of three sections; the Section A collected the socio-  
85 demographic data including age, sex, ethnicity, religion, institute and year of study. The  
86 religiosity and consideration of ethical aspect of SC research was also questioned.

87 The Section B included 18 questions regarding the students' general and specific  
88 knowledge of stem cells. Score '2' was set to the correct answer, score '1' was set if the  
89 answer was 'don't know' and score '0' was set for the wrong answer. Thus the highest  
90 possible score for each student was 36. Mean of the total knowledge score( $x=20$ ) was  
91 taken as a cut-off value for good knowledge and poor knowledge. A score greater than

92 20 was considered as good knowledge while a score of 20 and below was considered  
93 as poor knowledge.

94 Section C comprised of 10 questions structured after literature review to assess the  
95 attitude of students towards stem cell research and therapy. Mean of  $x=32$  was  
96 considered as a cut-off value for a positive attitude. A score of greater than 32 was  
97 considered as positive attitude and a score of 32 and below was considered as negative  
98 attitude.

99 Data was analyzed using SPSS version 23.0. To assess the internal consistency  
100 of the questionnaire the Cronbach Alpha coefficient was calculated to be 0.75.  
101 Descriptive statistics (frequency and percentages) identified demographic  
102 characteristics and students' responses to the questionnaire. Paired t tests were used to  
103 analyze the relationships and statistical significance was considered to be as p value <  
104 0.05. Pearson Test was used to find the correlation between knowledge and attitude of  
105 students towards stem cell research. Analysis included chi-square test to find significant  
106 association between knowledge and attitude of medical students towards stem cell  
107 research.

108

## 109 **Results**

110 A total of 206 students from all five years of MBBS participated in this survey.  
111 The mean age of the respondents was  $21 \pm 1.43$  years. Majority of them were females  
112 76.7% (n=158) and 23.3% were males (n=48). All of them were Muslims. There were  
113 more responses from Year 3 and 4 as illustrated in Table 1.

114 **Table 1. Demographic details of students**

|                      |               | Students (n=206)     | Frequency | Percentage |
|----------------------|---------------|----------------------|-----------|------------|
| <b>GENDER</b>        | Gender        | MALE                 | 48        | 23.3%      |
|                      |               | FEMALE               | 158       | 76.7%      |
| <b>YEAR OF STUDY</b> | Year Of Study | 1 <sup>st</sup> Year | 25        | 12.1%      |
|                      |               | 2 <sup>nd</sup> Year | 19        | 9.2%       |
|                      |               | 3 <sup>rd</sup> Year | 44        | 21.4%      |
|                      |               | 4 <sup>th</sup> Year | 87        | 42.2%      |
|                      |               | 5 <sup>th</sup> Year | 31        | 15%        |

115

116

117

118           Religiosity was self-reported by the respondents and most of them (76.2%)  
119 characterized themselves to as moderately religious.

120

121

### **Fig 1. Self-reported religiosity**

122

123           They were further inquired whether they considered stem cell research to be  
124 ethical and 66% of the respondents did agree that SCR is ethical.

124

125

### **Fig 2. Ethical consideration**

126

127           Results showed that 90.8% (n=187) of respondents declared to have generic  
128 knowledge regarding stem cells but only 35.9% (n=74) had specific knowledge of stem  
129 cells. It was seen that 25.2% (n=52) had not learned about stem cells from vocational or  
130 training courses however, 89.3% (n=184) responded positively about interest in  
developing their knowledge about stem cells. For further evaluation of the students'

131 level of knowledge on stem cells, they were given a few questions and statements to  
 132 answer.

133 **Table 2: Assessing stem cell knowledge**

| #  | Question                                                                                                     | Correct     | Incorrect  | Don't know |
|----|--------------------------------------------------------------------------------------------------------------|-------------|------------|------------|
| 1  | Do you have a generic knowledge of stem cells?                                                               | 90.8%(187)  | 8.3%(17)   | 1%(2)      |
| 2  | Do you have a specific knowledge of stem cells?                                                              | 35.9%(74)   | 58.7%(121) | 5.3%(11)   |
| 3  | Did you ever attend vocational and training courses or meetings regarding stem cells?                        | 72.8%(150)  | 25.2%(52)  | 1.9%(4)    |
| 4  | Would you be interested in developing your knowledge about stem cells?                                       | 89.3%(184)  | 8.7%(18)   | 1.9%(4)    |
| 1  | Do you know about the therapeutic applications with stem cells?                                              | 66.5%(137)  | 25.7% (53) | 7.8% (16)  |
| 2  | Stem cells can be used to test new drugs.                                                                    | 78.2%(161)  | 7.8% (16)  | 14.1% (29) |
| 3  | Stem cells can be used to treat Parkinson's, Alzheimer's, cancer, diabetes or heart diseases                 | 69.4%(143)  | 13.1% (27) | 17.5% (36) |
| 4  | Stem cells can <b>divide and re-new</b> for long periods.                                                    | 92.2%(190)  | 2.9% (6)   | 4.9% (10)  |
| 5  | Embryonic stem cells are un-specialized and capable of forming any cell type in the body including placenta. | 86.4%(178)  | 7.8% (16)  | 5.8% (12)  |
| 6  | Stem cells can give rise to cancers.                                                                         | 58.35%(120) | 22.3%(46)  | 19.4%(40)  |
| 7  | It is possible to isolate stem cells from human embryos (without their sacrifice)                            | 66.5%(137)  | 13.1% (27) | 20.4% (42) |
| 8  | It is possible to isolate stem cells from the umbilical cord.                                                | 56.3% (116) | 19.4% (40) | 24.3%(50)  |
| 9  | Sperm and eggs are a source for adult stem cells.                                                            | 51% (105)   | 30.6% (63) | 18.4% (38) |
| 10 | Adult stem cells are also known as somatic stem cells.                                                       | 65.5%(135)  | 20.9%(43)  | 13.6%(28)  |
| 11 | Multipotent stem cells can be induced from normal skin cells by genetic reprogramming.                       | 58.7%(121)  | 19.9%(41)  | 22.3%(46)  |

|           |                                                                                                                                                         |           |           |           |
|-----------|---------------------------------------------------------------------------------------------------------------------------------------------------------|-----------|-----------|-----------|
| <b>12</b> | Bone marrow stem cells are taken from the spine.                                                                                                        | 50%(100)  | 31.3%(64) | 18.9%(39) |
| <b>13</b> | Umbilical cord blood stem cell transplantation is less efficient compared to bone marrow stem cell transplantation.                                     | 46.1%(95) | 21.4%(44) | 32.5%(67) |
| <b>14</b> | Stem cells are maintained by obligatory asymmetric replication i.e. one cell is similar to mother cell while other is a completely differentiated cell. | 40.3%(83) | 31.3%(64) | 28.6%(59) |

134

135

136

137

138

139

140

141

142

143

144

145

146

147

148

149

Most of the students were aware of umbilical cord, embryonic and adult stem

cells and the therapeutic applications of stem cells. However, it should be noted that

only 2 participants answered correctly to all 14 questions of knowledge regarding stem

cells.

The mean of knowledge scores was calculated as 20. All scores above 20 were

considered to be good knowledge whereas a score of 20 and below was considered to

be poor knowledge. Hence, out of n=206 students, 60.2% (n=124) were found to have

good knowledge and 39.8% (n=82) had poor knowledge of stem cells.

### Fig 3. Result of knowledge scores

To study the attitude and perception of students towards stem cell research, they were

given a list of statements to rank their views on a 5 point Likert scale.

**Table 3. Assessing attitude regarding stem cell research**

| #        | Questions                        | Strongly disagree | Disagree | Not sure | Agree    | Strongly agree |
|----------|----------------------------------|-------------------|----------|----------|----------|----------------|
| <b>1</b> | I approve of stem cell research. | 8.7% (18)         | 4.4%(9)  | 17.5%    | 51%(105) | 18%(37)        |



|           |                                                                                                                                                             |            |            | (36)       |            |            |
|-----------|-------------------------------------------------------------------------------------------------------------------------------------------------------------|------------|------------|------------|------------|------------|
| <b>2</b>  | I am worried that stem cell transplantation might potentially open doors to human being killed for the benefit of others.                                   | 4.4% (9)   | 24.8%(51)  | 33% (68)   | 27.2% (56) | 10.2% (21) |
| <b>3</b>  | The government should prohibit all researches regarding embryonic stem cells from embryo or aborted fetus.                                                  | 2.9%(6)    | 8.3%(17)   | 33.5% (69) | 35.4% (73) | 19.4% (40) |
| <b>4</b>  | Life begins at conception; thus, embryonic stem cell research which involves the destruction of embryo is immoral, illegal and unnecessary.                 | 18%(37)    | 23.3%(48)  | 28.6% (59) | 16% (33)   | 13.6%(28)  |
| <b>5</b>  | A blastocyst should be given the same respect and right to live as a living human adult.                                                                    | 20.9%(43)  | 33%(68)    | 21.8% (45) | 11.2% (23) | 12.6%(26)  |
| <b>6</b>  | There IS A MORAL DIFFERENCE between creating embryos specifically for research and using embryos remaining after IVF (in vitro fertilization) for research? | 8.7% (18)  | 11.7%(24)  | 26.7% (55) | 37.9% (78) | 14.6% (30) |
| <b>7</b>  | Embryos can specifically be made to be used for stem cell research and be destroyed during the study.                                                       | 17.5% (36) | 21.4% (44) | 32% (66)   | 22.3% (46) | 6.3% (13)  |
| <b>8</b>  | Stem cell transplantation should be widely practiced.                                                                                                       | 8.7% (18)  | 13.1% (27) | 38.8% (80) | 31.6% (65) | 7.3% (15)  |
| <b>9</b>  | There should be awareness programs regarding stem cells and its use in research.                                                                            | 8.7% (18)  | 4.9% (10)  | 21.8% (45) | 42.7% (88) | 21.8% (44) |
| <b>10</b> | The future of mankind is bright if stem cell research could be successfully conducted.                                                                      | 8.7% (18)  | 4.9% (10)  | 21.8% (45) | 42.7% (88) | 21.8% (44) |

150

151 There were 52.5% (n=108) students who were of the opinion that there is a moral  
152 difference between creating embryos and using them specifically for research and using  
153 embryos remaining after In Vitro Fertilization (IVF) for research. Whereas only 29.6%  
154 (n=61) respondents believed that life begins at conception; thus, embryonic stem cell

155 research which involves the destruction of embryo is immoral. There were also  
156 concerns by some students (n=77) about the potential of misuse of stem cell research  
157 for commercial purposes benefitting others.

158 The mean of the answers was taken and was calculated to be 32. Scores above  
159 32 were considered to be a positive attitude and a score of 32 or below was considered  
160 to be a negative attitude. Results showed that 56.8% (n=117) expressed positive  
161 attitude and 43.2% (n=89) expressed negative attitude towards stem cell research.

162

#### 163 **Fig 4. Result of attitude scores**

164

165 Independent t-test applied on knowledge score and attitude showed that the  
166 mean knowledge score of people with positive attitude is higher i.e. 21.25 as compared  
167 to the mean knowledge score of people with negative attitude i.e. 19.21. And the  
168 difference of the means is significant at  $p=0.007$ . Thus, increasing the awareness  
169 regarding stem cell research can increase its acceptability.

170

**Table 4. Independent samples t-test results of knowledge and attitude**

|                         | ATTITUDE | N   | Mean  | t      | df  | p            |
|-------------------------|----------|-----|-------|--------|-----|--------------|
| <b>Knowledge Scores</b> | Positive | 117 | 21.25 | -2.720 | 204 | <b>0.007</b> |
|                         | Negative | 89  | 19.21 |        |     |              |

171

## 172 **Discussion**

173 Stem cells have tremendous potential as it is clearly evident by the use of blood  
174 stem cells to treat diseases like leukemia; and can also be appreciated in the use of  
175 stem cells for tissue grafts to treat diseases or injuries to the bone, skin and eye [9].

176 In Pakistan, not much data is available on stem cell research with less than 100  
177 articles published in PubMed. A stem cell society; Pakistan Stem Cells Society (PSCS)  
178 was established as late as 2012 [10]. Higher Education Commission (HEC) and  
179 Pakistan Science foundation (PSF) have approved many research projects on stem  
180 cells recently but they show slow development, mainly because of lack of funding,  
181 specific equipment and trained manpower.

182 According to our results, the knowledge level of the students is encouraging and  
183 suggests that they would be a trusted source of information, which would enable  
184 patients to make an informed decision regarding use of stem cells as a recent  
185 innovation in treatment. Our study showed a good knowledge level of 60.2% as  
186 compared to a similar study in KSA showing 31.2% good knowledge and 56% moderate  
187 knowledge among the respondents [11]. There was no association of stem cell  
188 awareness with gender, nationality, race, or year of study of the respondents in medical  
189 college corresponding to another study in Pakistan [12].

190 A strong majority of students (89.3%) also expressed willingness to develop their  
191 knowledge of stem cells in addition to the knowledge imparted through their curriculum  
192 which indicates that they are not neglectful of the topic and are encouraged to know  
193 more about it. Khali also reported that 92% of the respondents desired to attain  
194 coherent education about stem cells in a study conducted in Egypt [13].

195 It is also important to consider that stem cell research poses serious ethical and  
196 legal concerns and requires great responsibility especially when it comes to embryonic  
197 stem cells which can be created in laboratories solely for research. Majority of the  
198 respondents approved of stem cell research and believed it should be practiced widely.

199 When considering from the religious point of view, it was seen that 66% students  
200 agreed that stem cell research is ethical. This majority is encouraging considering that  
201 all the students were Muslims and most of them considered themselves to be  
202 moderately religious. This is contrary to the findings of a study conducted in Australia  
203 where the Christian community considered embryonal stem cell research to be  
204 unacceptable [14].

205 Moreover, the distinction between creating stem cell specifically for research and  
206 using the surplus stem cells remaining after IVF was clearly understood by 52.5% of the  
207 students. This result correlated to a survey carried out in the US and Canada in 2008  
208 where it was seen that 92% respondents supported stem cells derived from IVF as  
209 opposed to cloned embryos [15].

210 The students expressed concern over the misuse of stem cells research for  
211 promoting killing of human embryos for commercial purposes. This finding is in  
212 accordance to a study conducted in Greece where 73.6% were concerned that the  
213 umbilical cord blood could be used for purposes different than welfare in regenerative  
214 medicine [16].

215

## 216 **Conclusion**

217 In the light of the findings of this study, it is concluded that the medical students of  
218 Pakistan showed statistically significant and affirmative knowledge as well as attitude  
219 towards stem cell therapy which indicates that in the near future, the field of applied  
220 biomedical sciences will show progress in leaps and bounds comparable to international

221 standards. It is also encouraging to note that religiosity does not pose a significant  
222 threat to the future of SCR in Pakistan.

## 223 **Recommendations**

224 Stem cell therapy heralds a new dawn in the treatment of many prevalent diseases  
225 which can be very favorable for mankind.

- 226 ○ The topic of stem cells and its therapeutic prospects must be made an extensive  
227 part of the medical curriculum to fill the theoretical knowledge deficits and inspire  
228 research in this field among students.
- 229 ○ The government should provide adequate funds for projects to promote both  
230 basic and applied stem cell research.
- 231 ○ Further studies should involve a larger sample population involving all medical  
232 colleges in Pakistan so as to obtain a more generalized conclusion.
- 233 ○ There should be seminars, symposiums and workshops in research centers and  
234 hospitals so that information and expertise could be shared and interest is  
235 developed in our young researchers and clinicians.

## 236 **Limitations**

237 The limitations should also be taken into account for the results that have been  
238 presented. The small sample size presents a limitation and therefore the results may  
239 not be generalizable.

## 240 **Acknowledgments**

241 The authors wish to thank the students of Rawalpindi Medical University for  
242 their cooperation.

## 243 **References**

- 244 1) Weissman IL, Anderson DJ, Gage F. Stem and Progenitor Cells: Origins,  
245 Phenotypes, Lineage Commitments, and Transdifferentiations. *Annu Rev Cell*  
246 *Dev Biol.* 2001;17:387-403.
- 247 2) Sivakumar M, Dineshshankar J, Sunil P, Nirmal R, Sathiyajeeva J, Saravanan B.  
248 Stem cells: An insight into the therapeutic aspects from medical and dental  
249 perspectives. *Journal of Pharmacy and Bioallied Sciences.* 2015;7(6):361.
- 250 3) Arey L *Developmental Anatomy: A Textbook and Laboratory Manual of*  
251 *Embryology.* Ind Med Gaz. 1947 Jul;82(7):434–5.
- 252 4) Henig I, Zuckerman T. Hematopoietic stem cell transplantation—50 years of  
253 evolution and future perspectives. *Rambam Maimonides medical journal.* 2014  
254 Oct;5(4).
- 255 5) Shamsi TS, Hashmi K, Adil S, Ahmad P, Irfan M, Raza S, Masood N, Shaikh U,  
256 Satti T, Farzana T, Ansari S. The stem cell transplant program in Pakistan—the  
257 first decade. *Bone marrow transplantation.* 2008 Aug;42(1):S114-7.
- 258 6) Dylla SJ, Beviglia L, Park IK, Chartier C, Raval J, Ngan L, Pickell K, Aguilar J,  
259 Lazetic S, Smith-Berdan S, Clarke MF. Colorectal cancer stem cells are enriched  
260 in xenogeneic tumors following chemotherapy. *PLoS one.* 2008;3(6).
- 261 7) Damme A, Driessche T, Collen D, Chuah MK. Bone marrow stromal cells as  
262 targets for gene therapy. *Current gene therapy.* 2002 May 1;2(2):195-209.
- 263 8) Das S, Tobe B, Jain PA, Niles W, Winkquist A, Mastrangelo L, Snyder EY. The  
264 Application and Future of Neural Stem Cells in Regenerative Medicine.  
265 *In Translational Regenerative Medicine* 2015 Jan 1 (pp. 403-413).
- 266 9) Wert GD, Mummery C. Human embryonic stem cells: research, ethics and policy.  
267 *Human reproduction.* 2003 Apr 1;18(4):672-82.
- 268 10) Zahra SA, Muzavir SR, Ashraf S, Ahmad A. Stem cell research in Pakistan;  
269 past, present and future. *International journal of stem cells.* 2015 May;8(1):1.
- 270 11) Tork H, Alraffaa S, Almutairi KJ, Alshammari NE, Alharbi AA, Alonzi AM. Stem  
271 cells: knowledge and attitude among health care providers in Qassim region,  
272 KSA. *International Journal of Advanced Nursing Studies.* 2018;7(1):1-7.
- 273 12) Khalil AM, Sharshor SM. Pediatric Nurses Knowledge, Awareness and Attitude  
274 towards Application of Stem Cells Therapy in Children. *IOSR Journal of Nursing*  
275 *and Health Science.* 2016;5(4):88-96.#
- 276 13) Mohammed HS, El Sayed HA. Knowledge and attitude of maternity nurses  
277 regarding cord blood collection and stem cells: An educational intervention.  
278 *Journal of Nursing Education and Practice.* 2015 Apr 1;5(4):58.
- 279 14) Tuch BE. Stem cells: a clinical update. *Australian family physician.* 2006  
280 Sep;35(9):719.

- 281 15) Downey R, Geransar R. Stem cell research, publics' and stakeholder views.  
282 Health Law Review. 2008;16(2):69.
- 283 16) Hatzistilli H, Zissimopoulou O, Galanis P, Siskou O, Prezerakos P,  
284 Zissimopoulos A, Kaitelidou D. Health Professionals' knowledge and attitude  
285 towards the Umbilical Cord Blood donation in Greece. Hippokratia. 2014  
286 Apr;18(2):110.

To what level do you consider yourself to be religious?

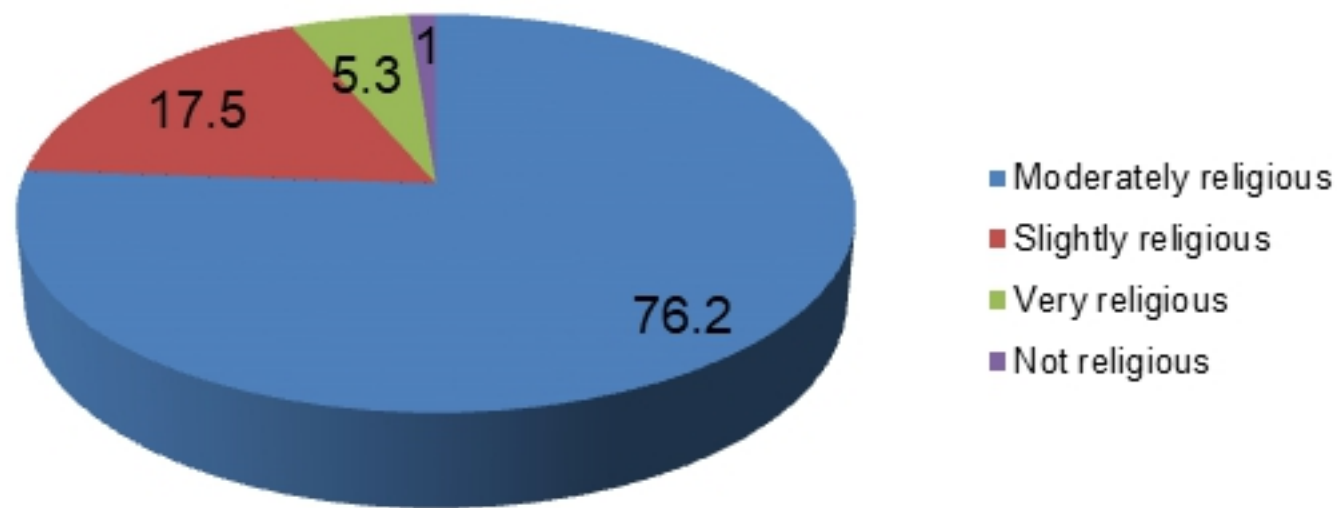

Figure



# From a religious stand point, is stem cell research ethical?

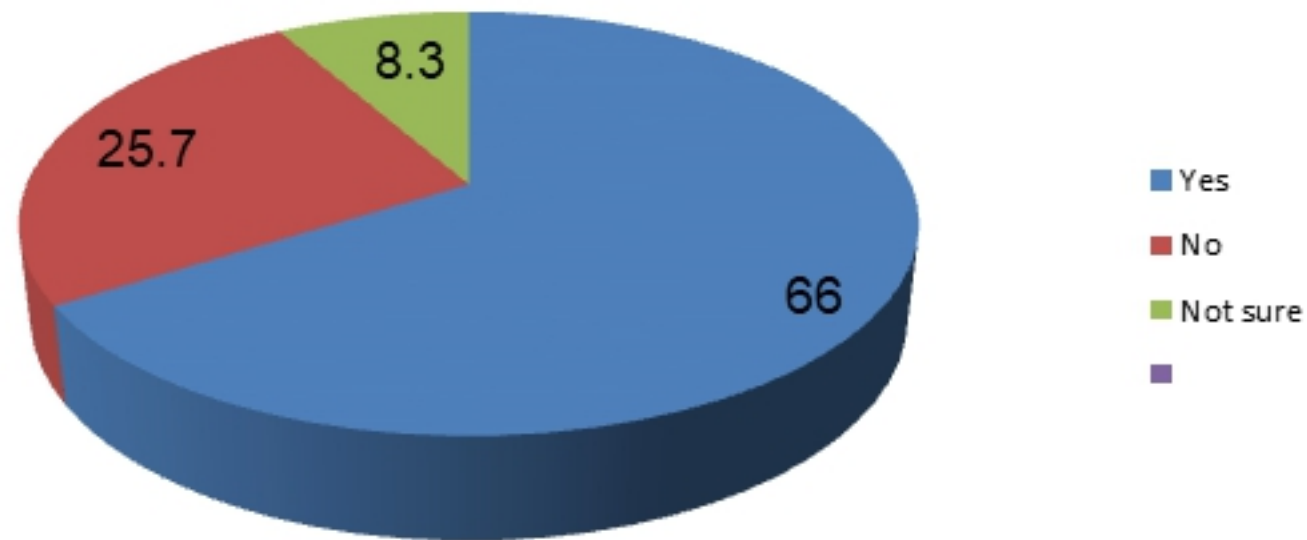

Figure

## KNOWLEDGE LEVEL

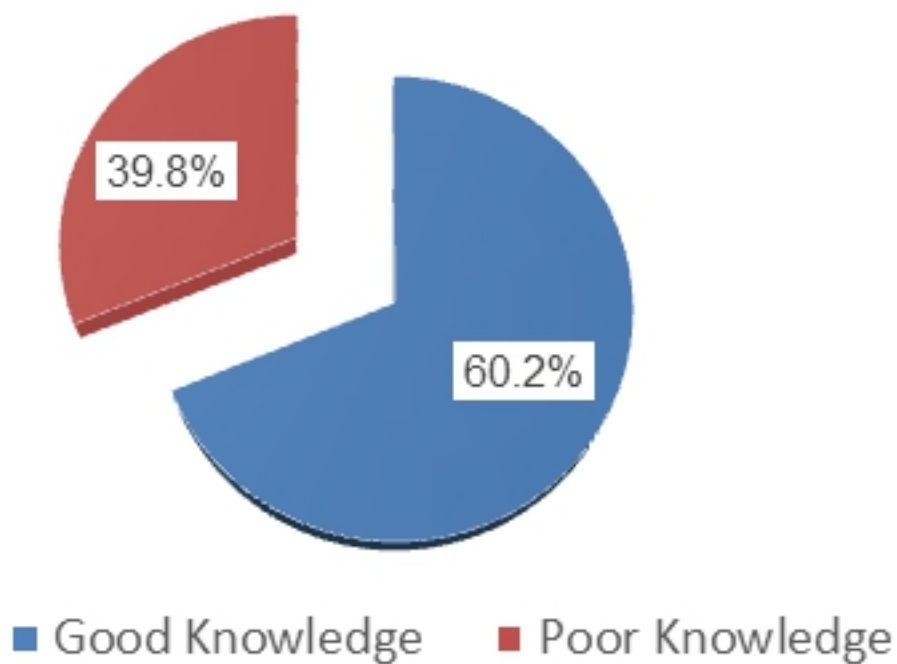

Figure

## ATTITUDE

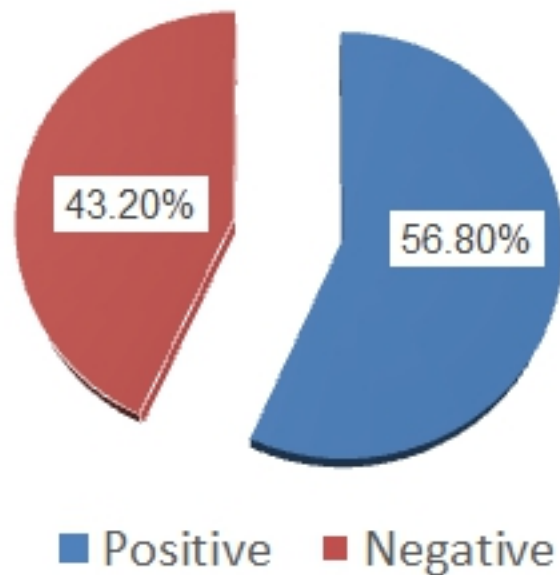

Figure
